# Supplementary material for: Plasticity within the barrel domain of BamA mediates a hybrid-barrel mechanism by BAM
Source: PubMed Central journal article supplement (PMC8655018; doi:10.1038/s41467-021-27449-4), 2021-12-08
Supplement: 41467_2021_27449_MOESM1_ESM.pdf [file 41467_2021_27449_MOESM1_ESM.pdf]

1 **Supplementary Information for the following manuscript:**  
2  
3  
4

5 **Plasticity within the barrel domain of BamA mediates a hybrid-barrel**  
6 **mechanism by BAM**

7 Runrun Wu<sup>1,\*</sup>, Jeremy W. Bakelar<sup>2,\*†</sup>, Karl Lundquist<sup>3,\*‡</sup>, Zijian Zhang<sup>3</sup>, Katie M. Kuo<sup>4</sup>, David  
8 Ryoo<sup>5</sup>, Yui Tik Pang<sup>3</sup>, Chen Sun<sup>2</sup>, Tommi White<sup>6</sup>, Thomas Klose<sup>2,7</sup>, Wen Jiang<sup>1,2,7,8</sup>, James C.  
9 Gumbart<sup>3,4,±</sup>, and Nicholas Noinaj<sup>1,2,8,±</sup>

10 <sup>1</sup> Interdisciplinary Life Science - PULSe, Purdue University, West Lafayette, Indiana, 47907

11 <sup>2</sup>Markey Center for Structural Biology, Department of Biological Sciences, Purdue University,  
12 West Lafayette, Indiana, 47907

13 <sup>3</sup>School of Physics, Georgia Institute of Technology, Atlanta, Georgia, 30332

14 <sup>4</sup>School of Chemistry and Biochemistry, Georgia Institute of Technology, Atlanta GA 30332

15 <sup>5</sup>Interdisciplinary Bioengineering Graduate Program, Georgia Institute of Technology, Atlanta,  
16 GA 30332

17 <sup>6</sup>Electron Microscopy Core Research Facility, W125 Vet Med Building, University of Missouri,  
18 Columbia, Missouri, 65211

19 <sup>7</sup>Purdue CryoEM Facility, Suite 171, Hockmeyer Hall for Structural Biology, Purdue University,  
20 West Lafayette, Indiana, 47907

21 <sup>8</sup>Purdue Institute of Inflammation, Immunology and Infectious Disease, Purdue University, West  
22 Lafayette, Indiana, 47907

23  
24  
25  
26  
27  
28  
29  
30  
31  
32  
33  
34  
35  
36  
37  
38  
39  
40

1  
2  
3  
4  
5  
6  
7  
8  
9

**Supplementary Figure 1. Negative-stain EM of BAM-inserted nanodiscs.** **a.** BAM inserted into MSP1D1 (D1). **b.** BAM inserted into MSP1E3D1 (E3). **c.** BAM inserted into MSP2N2 (N2). For panels A-C, top row shows SEC traces along with an SDS-PAGE gel of the peak fraction, while the bottom row is a negative-stain EM micrograph using 0.75% uranyl formate. The scale bars represent 50 nm. Source data are provided as a Source Data file (same as in the main text Figure 1, panels c). **d.** Shown are 2D classes from 2D classification of BAM-inserted D1 nanodiscs, with projection matching (20 Å lowpass filtered), and model orientation matching based on the BAM structure in the outward-open state.

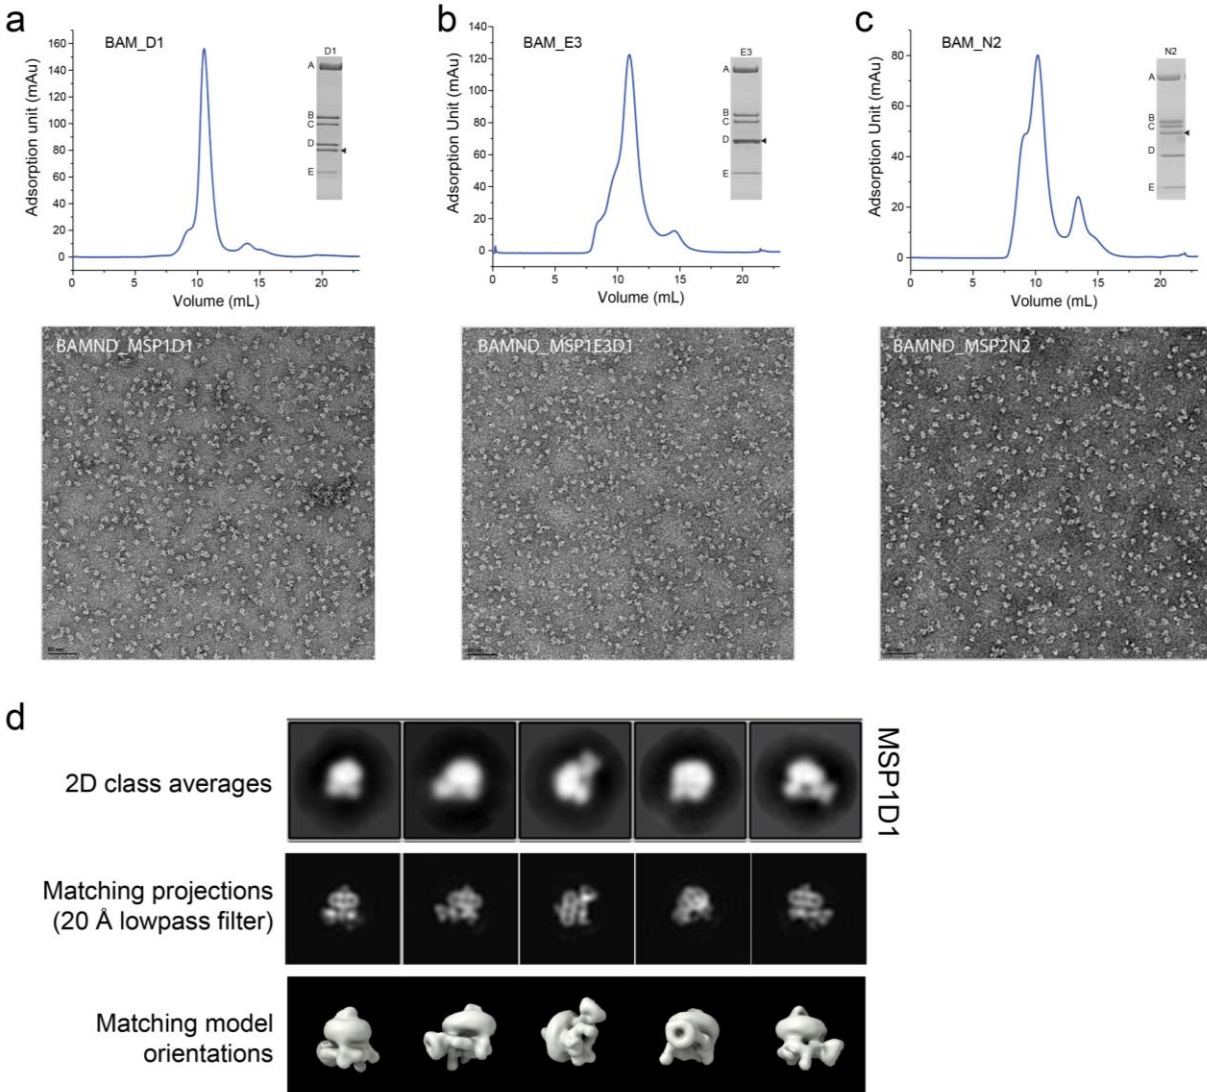

10  
11  
12  
13  
14  
15  
16  
17

1 **Supplementary Figure 2. CryoEM reconstructions of BAM in different sized nanodiscs.** **a.**  
 2 Shown are 2D class averages from 2D classification of BAM in MSP1D1, MSP1E3D1, and  
 3 MSP2N2 nanodiscs. **b.** 3D reconstructions of BAM in each of the different sized nanodiscs,  
 4 showing side, top, and bottom views. **c.** A superposition of the three reconstructions revealing  
 5 nearly identical reconstructions, with the bottom panel showing minimal differences in the  
 6 apparent sizes of the nanodisc densities. **d.** The BAM/MSP1D1 cryoEM map (transparent gray  
 7 isosurface) is shown aligned to the outward-open (green) and inward-open (magenta) states of  
 8 BAM. Overall fit to the map is shown on the left with a zoomed view of the lateral seam shown  
 9 on the right. **e.** Orthogonal views of the superposition of the refined D1, E3, N2, and native  
 10 membrane nanodisc structures; calculated RMSD values ranged from 1.5 – 2.2, indicating  
 11 minimal conformational changes.

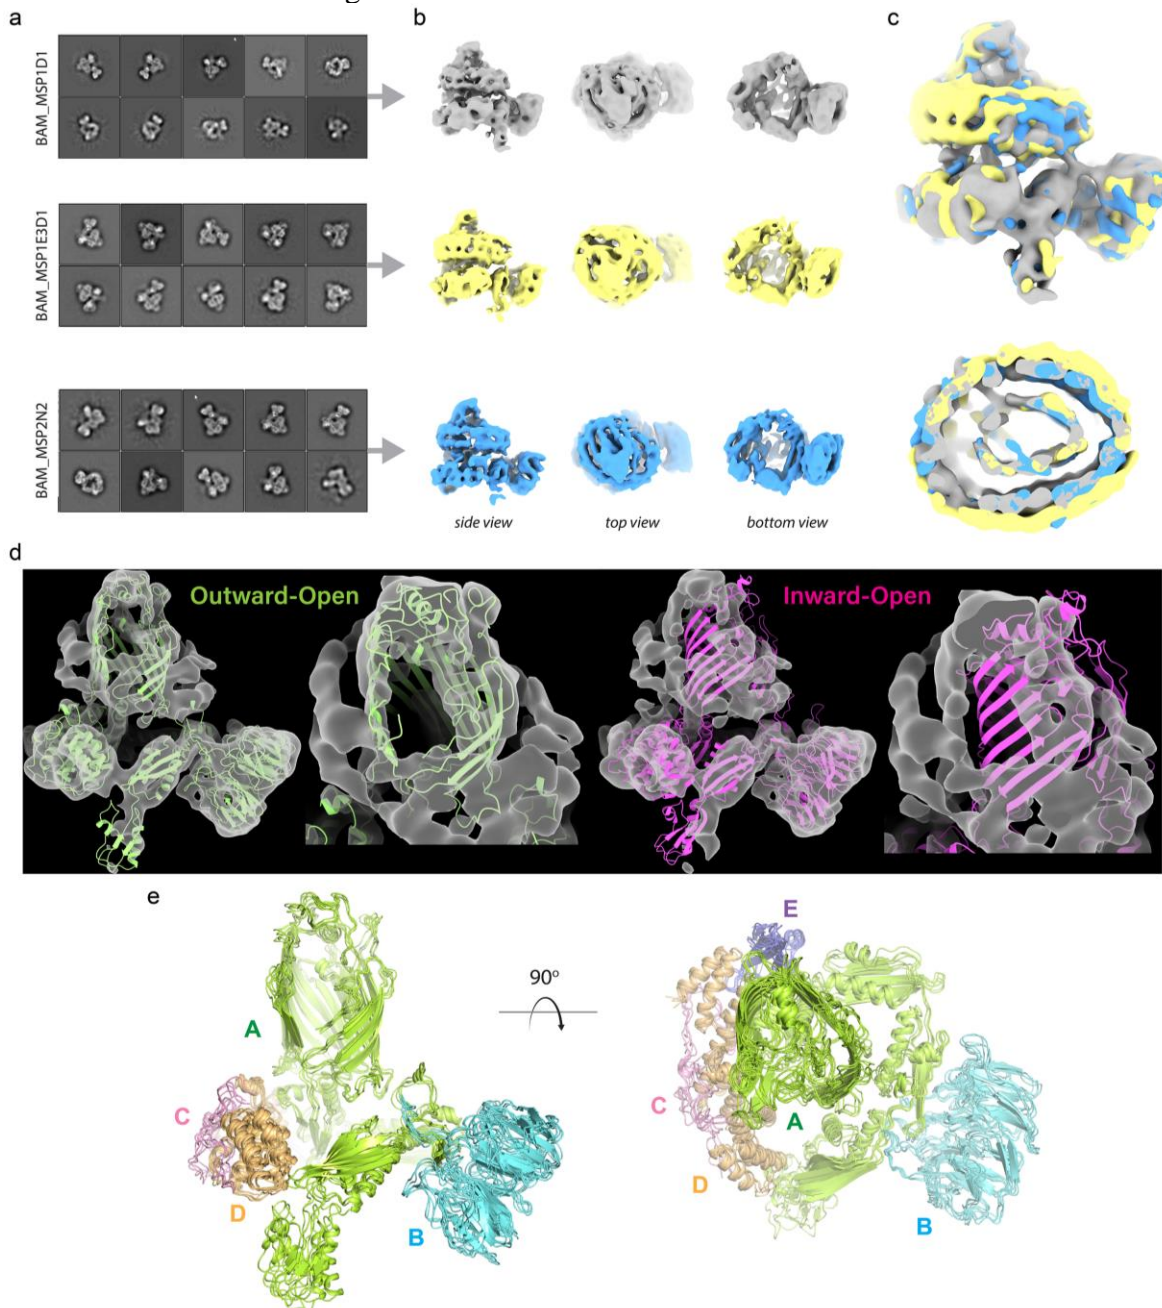

12

1  
2  
3  
4  
5  
6

**Supplementary Figure 3. High-resolution cryoEM reconstruction of BAM-inserted E3 nanodiscs.** **a.** A representative motion corrected micrograph. The scale bar represents 100 nm. **b.** Selected 2D classes from 2D classification. **c.** Eight 3D classes from 3D classification. **d.** Refined 3D map to 4 Å resolution showing plots for angular distribution for all particles (**e**), FSC resolution estimation (**f**), and local resolution (**g**) of the final reconstruction.

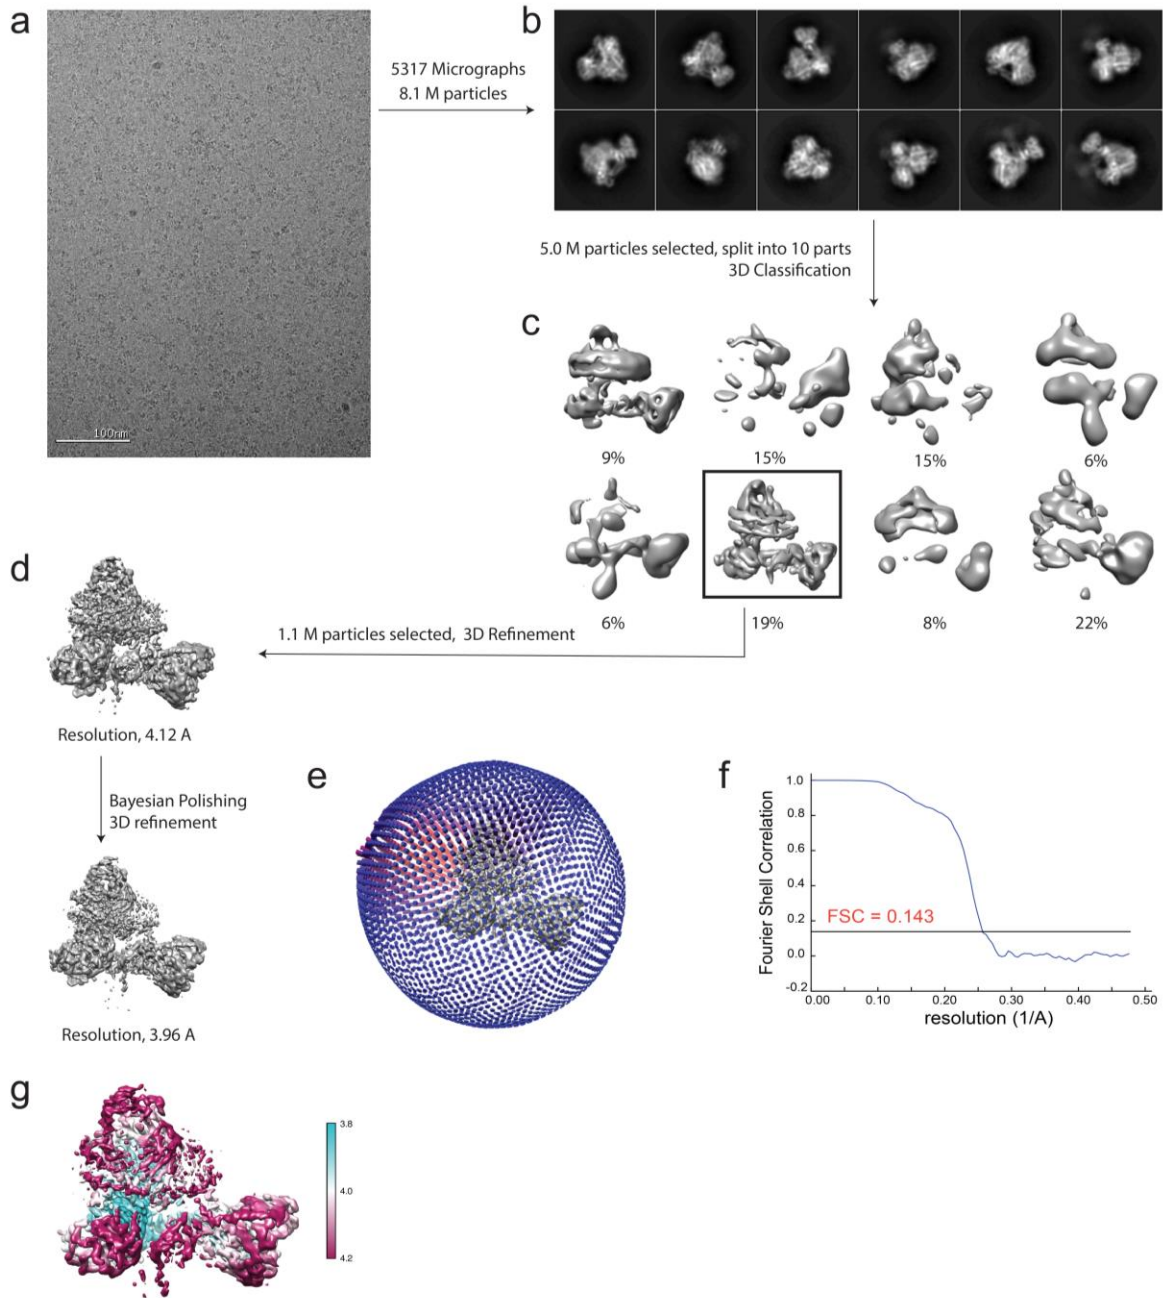

7  
8  
9  
10



1 **Supplementary Figure 4. Simulations of BAM in different sized nanodiscs.** a. Despite using  
 2 different sized nanodiscs, we observed nearly identical sized nanodisc densities for all of our  
 3 reconstructions. To explain this, we rationalized that aligning and averaging a circular shaped  
 4 object (representing BAM) randomly positioned within a ring (representing the nanodisc) would  
 5 lead to averaging out of density for most of the volume except for the region along the outer  
 6 perimeter of the object within the ring. b. To further verify our rationalization, we performed  
 7 computational simulations of the three sizes of nanodiscs (11, 13, and 17 nm) with a randomly  
 8 oriented 4 nm circular object (BAM). Upon averaging, a concentration of density with the  
 9 highest intensity was indeed observed along the outer perimeter of the object. c. Measurements  
 10 of the resulting densities for the different sized nanodiscs resulted in an average diameter of 8.5  
 11 nm with a range from 8.2 to 8.9 nm. These studies demonstrate that if objects within nanodiscs  
 12 are randomly positioned, the observed density for the nanodisc in the 3D reconstruction will be  
 13 dependent on the size of the object itself, assuming it is sufficiently large enough to dictate the  
 14 2D/3D alignments.  
 15

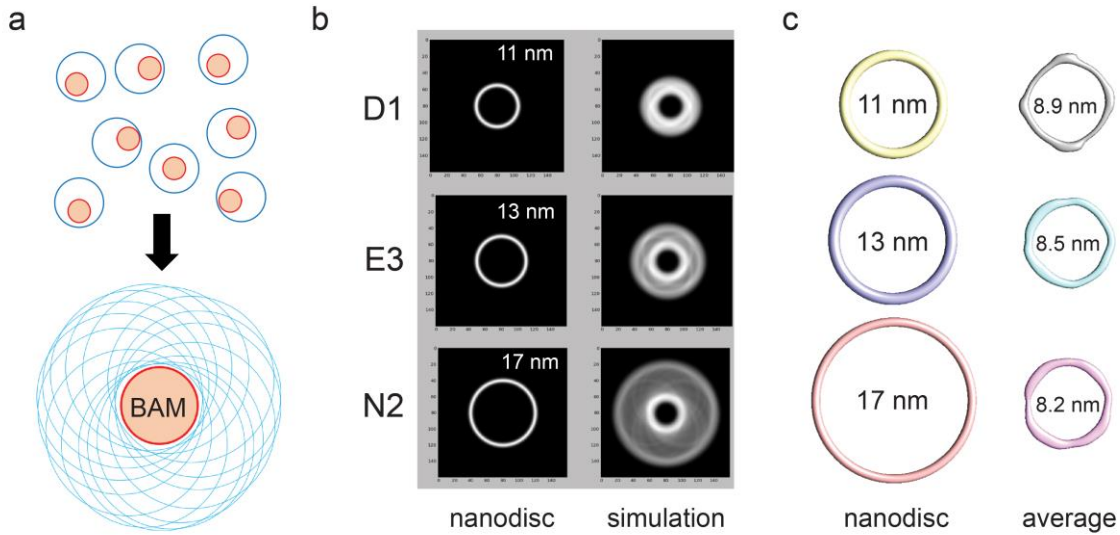

16  
 17  
 18  
 19  
 20  
 21  
 22  
 23  
 24  
 25  
 26  
 27  
 28  
 29  
 30  
 31  
 32

**Supplementary Figure 5. CryoEM structure of BAM-MSP nanodiscs prepared from native membranes.** **a.** SEC trace of BAM-inserted nanodiscs prepared from the outer membranes of BL21(DE3) cells. Source data are provided as a Source Data file (same as Figure 1, panel c). **b.** CryoEM micrograph and 2D class averages. **c.** The cryoEM reconstruction of BAM-MSP nanodiscs prepared from native membranes. **d.** Orthogonal views of the refined BAM structure fit into the cryoEM density map showing an outward-open conformation. **e.** The cryoEM map (transparent gray isosurface) is shown aligned to the outward-open (green) and inward-open (magenta) states of BAM. Overall fit to the map is shown on the left with a zoomed view of the lateral seam shown on the right. **f.** HPLC trace of the Blank (black) and BAM MSP nanodiscs from native membranes (red). **g.** Summary of selected hits (Lipid-A, PE, PG, and CL molecules) from the mass spec analysis with Scores ~80% or higher.

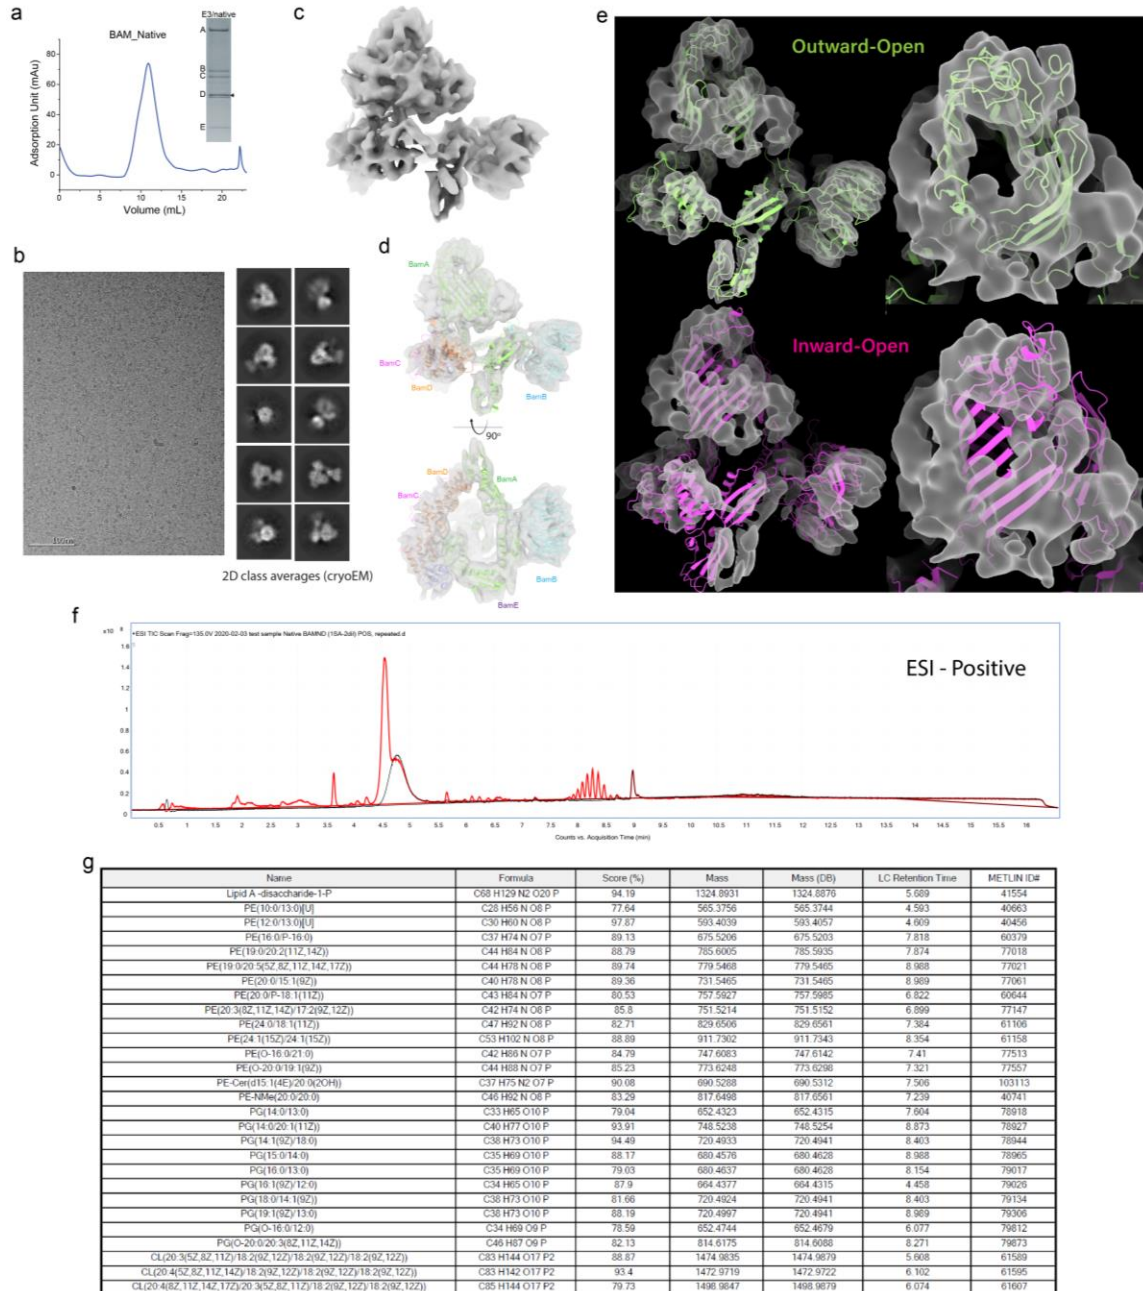

**Supplementary Figure 6. Dynamics of BAM from all MD simulations.** Dynamics of accessory proteins viewed from the extracellular side in the x-y (membrane) plane are shown in different colors with confidence ellipses ( $3\sigma$ ). All data was aligned with the center of BamA's  $\beta$ -barrel which is at (0, 0). Replica 1 (solid line), replica 2 (break line) and replica 3 (dotted line) are independent 6- $\mu$ s simulations. The positions of the lipoproteins taken from refined experimentally determined structures of the inward-open (PDB 5D0O) and outward-open (PDB 5LJO) states are shown as squares and diamonds, respectively. Each panel shows the dynamics from a different initial state, BAM(in), BAM $\Delta$ B(in), BAM $\Delta$ C(in), BAM $\Delta$ D(in), BAM $\Delta$ E(in), BAM(out) and BAM $\Delta$ B(out), separately.

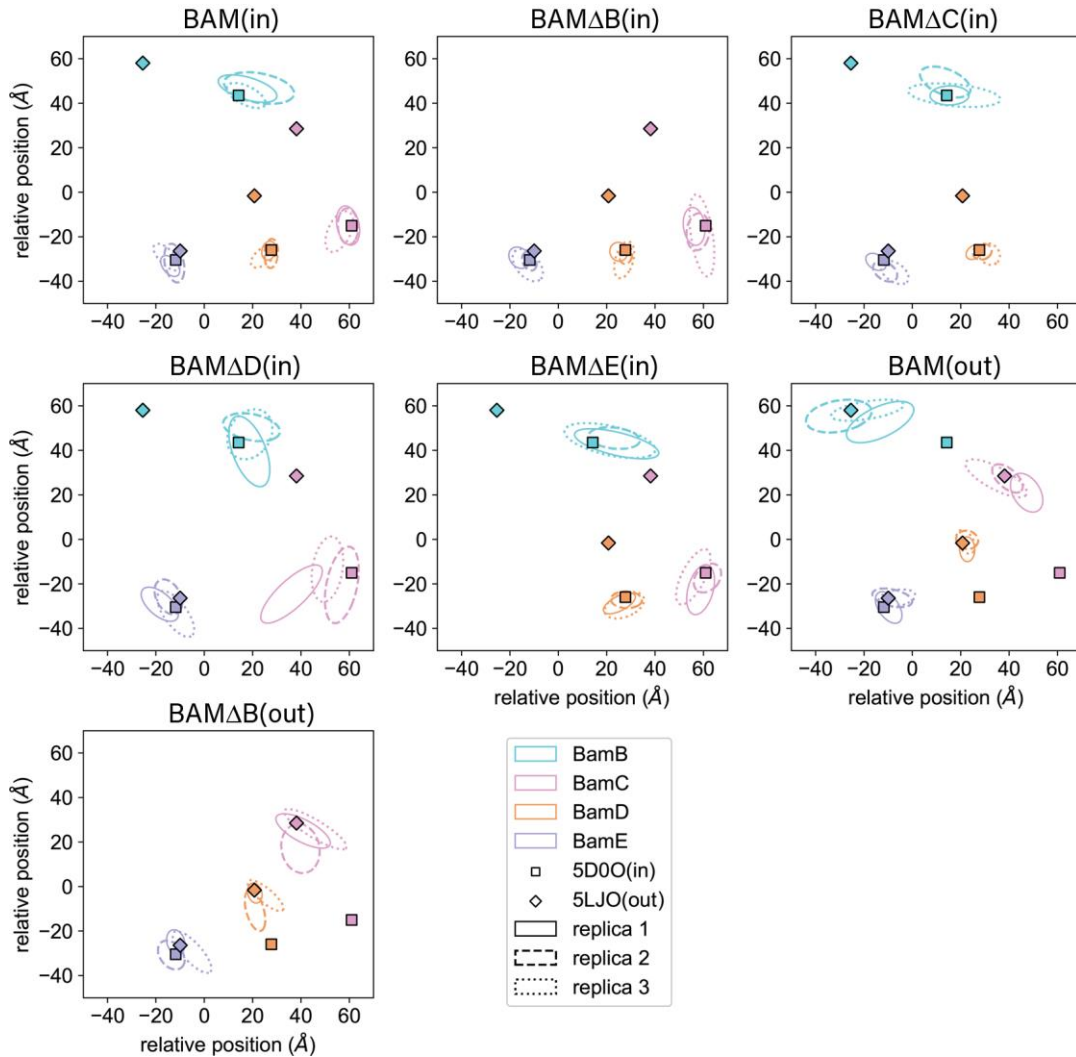

12  
 13  
 14  
 15  
 16  
 17  
 18  
 19  
 20

1 **Supplementary Figure 7. Rotation angle of the periplasmic domain ring in the membrane**  
2 **plane.** Rotation angles of the periplasmic domain ring in the membrane plane were calculated  
3 using the average angle made by BamB (when present), BamC and BamD with respect to BamA.  
4 Angles for systems BAM $\Delta$ C(in) (a), BAM $\Delta$ D(in) (b), and BAM $\Delta$ E(in) (c) are shown. The angle  
5 of these lipoproteins in the structure 5D0O is used as a reference and is measured  
6 counterclockwise as viewed from the extracellular space. Plots are from three independent 6- $\mu$ s  
7 simulations demonstrating a range of possible dynamics on this time scale. The dotted lines are  
8 the rotation angles in the structures used to initialize the inward-open state (0°; PDB 5D0O) and  
9 the outward-open state (63°; PDB 5LJO).  
10

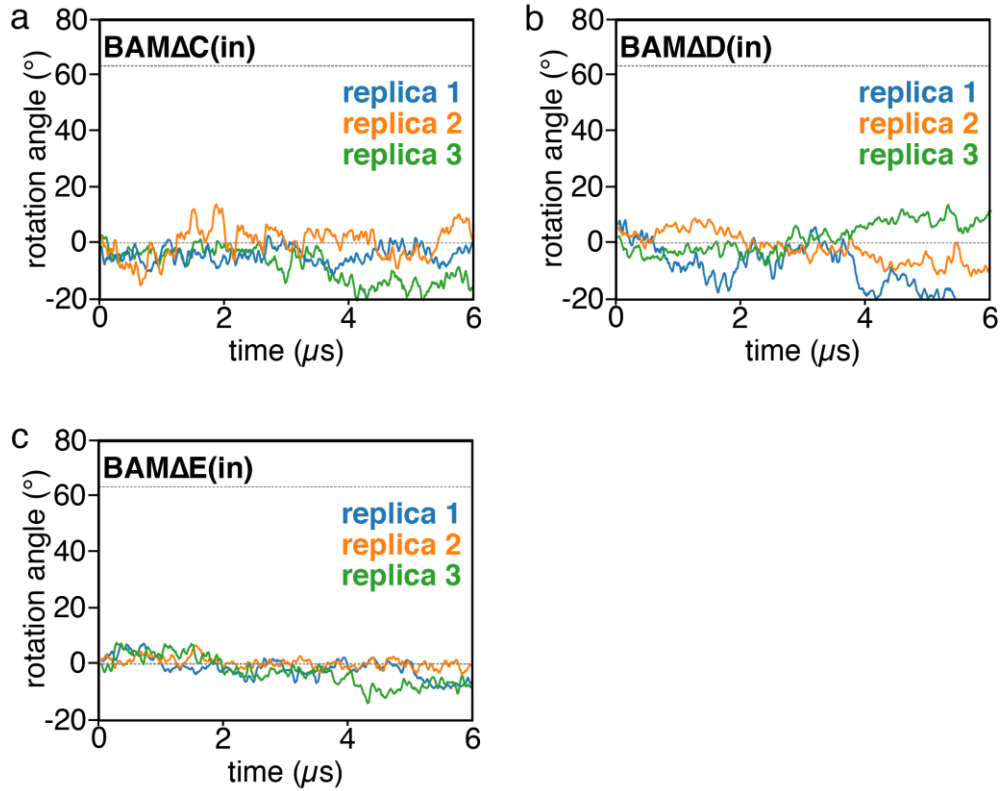

11  
12  
13  
14  
15  
16  
17  
18  
19  
20  
21  
22  
23  
24  
25  
26  
27  
28  
29



1  
2  
3  
4  
5

**Supplementary Figure 8. Snapshots from the beginning (0  $\mu$ s) and end (6  $\mu$ s) of trajectories for the BAM $\Delta$ B. a. BAM $\Delta$ B(in), replica 3. b. BAM $\Delta$ B(out), replica 3. c. BAM $\Delta$ B(out), replica 2.**

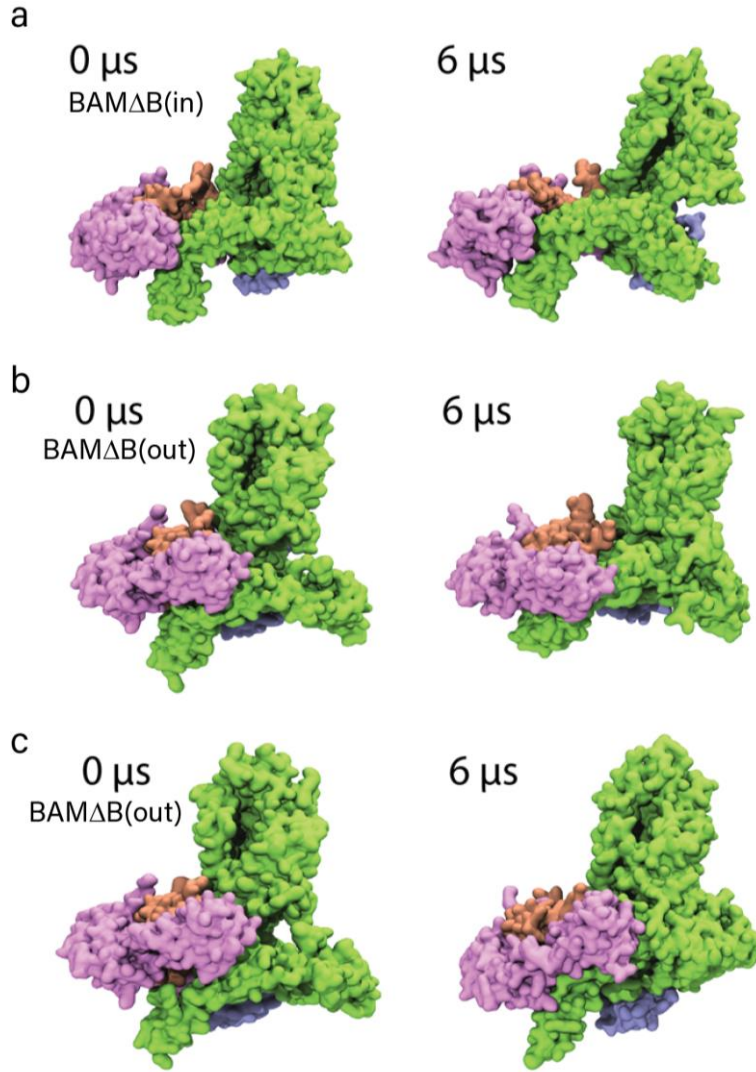

6  
7  
8  
9  
10  
11  
12  
13  
14  
15  
16  
17  
18  
19  
20

1 **Supplementary Figure 9. Moving average of the hydrogen bonds between the backbones of**  
2 **BamA lateral seam strands for BAM $\Delta$ C, BAM $\Delta$ D, and BAM $\Delta$ E.** Each panel shows the result  
3 of each system as titled, with three lines representing the result of each individual simulation.  
4

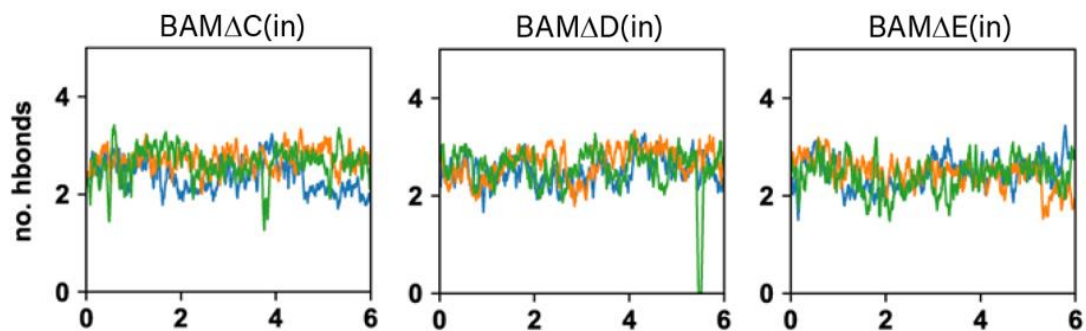

5  
6  
7  
8  
9  
10  
11  
12  
13  
14  
15  
16  
17  
18  
19  
20  
21  
22  
23  
24  
25  
26  
27  
28  
29  
30  
31  
32  
33  
34  
35  
36  
37  
38  
39  
40

1 **Supplementary Figure 10. Confidence ellipses based on x-y position of BamA's POTRA5**  
 2 **domain viewed from the extracellular side.** All data was aligned with the center of the BamA's  
 3  $\beta$ -barrel which is at (0, 0). **a.** Ellipses for the combinations of all three 6- $\mu$ s simulations are  
 4 shown for the four indicated systems. **b.** Replica 1 (solid line), replica 2 (broken line) and replica 3  
 5 (dotted line) are independent 6- $\mu$ s simulations. Different colors represent confidence ellipses  
 6 based on different initial states. The positions of the POTRA5 taken from experimentally  
 7 determined structures of the inward-open (PDB 5D0O) and outward-open (PDB 5LJO) states are  
 8 shown as squares and diamonds, respectively.

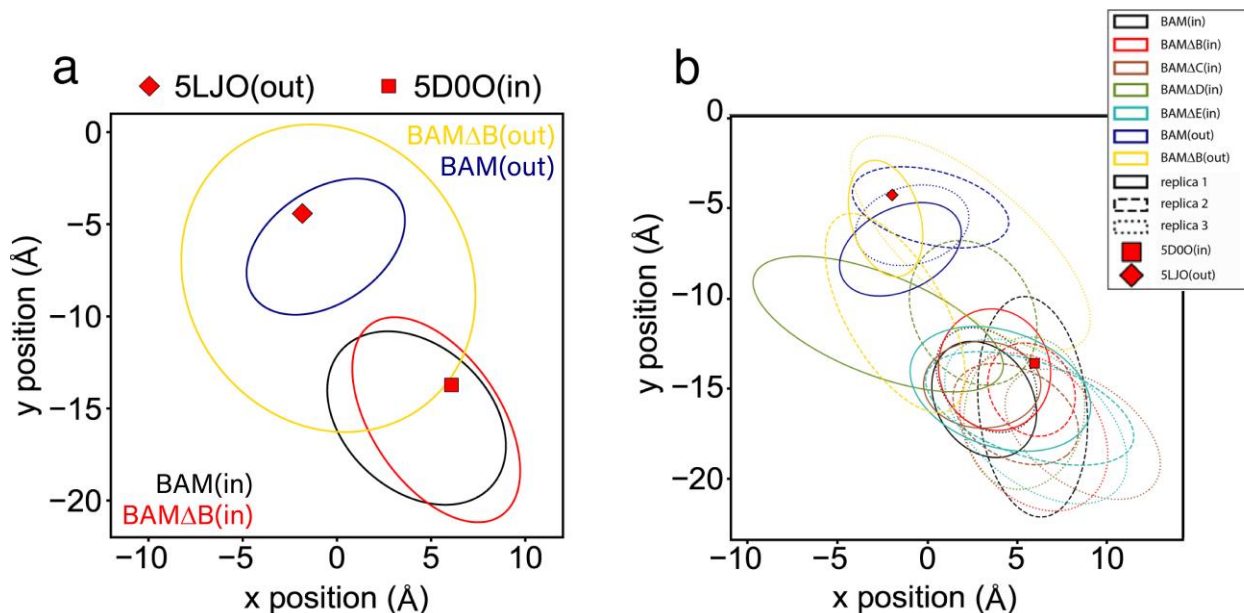

10  
11  
12  
13  
14  
15  
16  
17  
18  
19  
20  
21  
22  
23  
24  
25  
26  
27  
28  
29  
30  
31

1 **Supplementary Figure 11. BamA loop 3 crosslink mutant screening.** A crosslink mutant,  
2 designed to lock loop 3 to loop 6 in an outward-open state, was further assayed using colony titer  
3 assays and challenged with vancomycin (vanco) and rifampicin (rif). No effect was observed in  
4 the absence of arabinose, with only minimal effects even in the presence of both vancomycin and  
5 rifampicin. Assays were performed at least in triplicate with a representative image shown.  
6

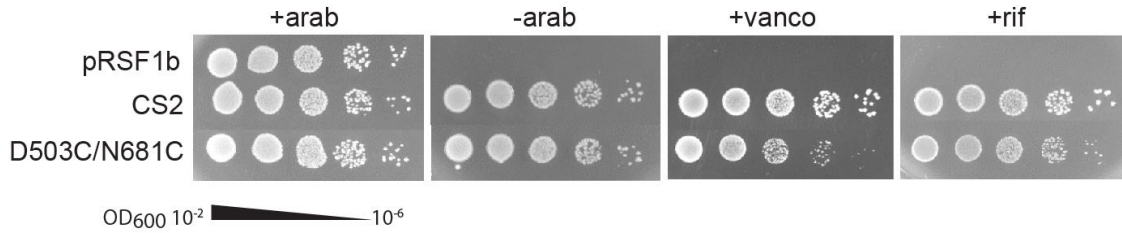

7  
8  
9  
10  
11  
12  
13  
14  
15  
16  
17  
18  
19  
20  
21  
22  
23  
24  
25  
26  
27  
28  
29  
30  
31  
32  
33  
34  
35  
36  
37  
38  
39



1 **Supplementary Figure 12. Targeted molecular dynamics (TMD) simulations of disulfide**  
2 **crosslink mutants.** Disulfide crosslink mutants include (a) 502C/706C, (b) 503C/681C, (c)  
3 393C/584C, (d) 425C/808C and (e) 431C/807C. The left panel shows the target structure (in  
4 white) and the structure at the end of the 100-ns simulation. Green indicates that the mutation  
5 was non-lethal (b), while tan indicates a growth-defect only when challenged with antibiotics (c),  
6 and red lethal (a, d, e). The center panel shows the distance from the target structure to the final  
7 structure with a gradient from white being the closest and the red being the farthest. The right  
8 panel shows the magnified region where the mutation is present. Note, in particular, the  
9 significant distortions introduced in lateral seam strands in (d) and (e).  
10  
11

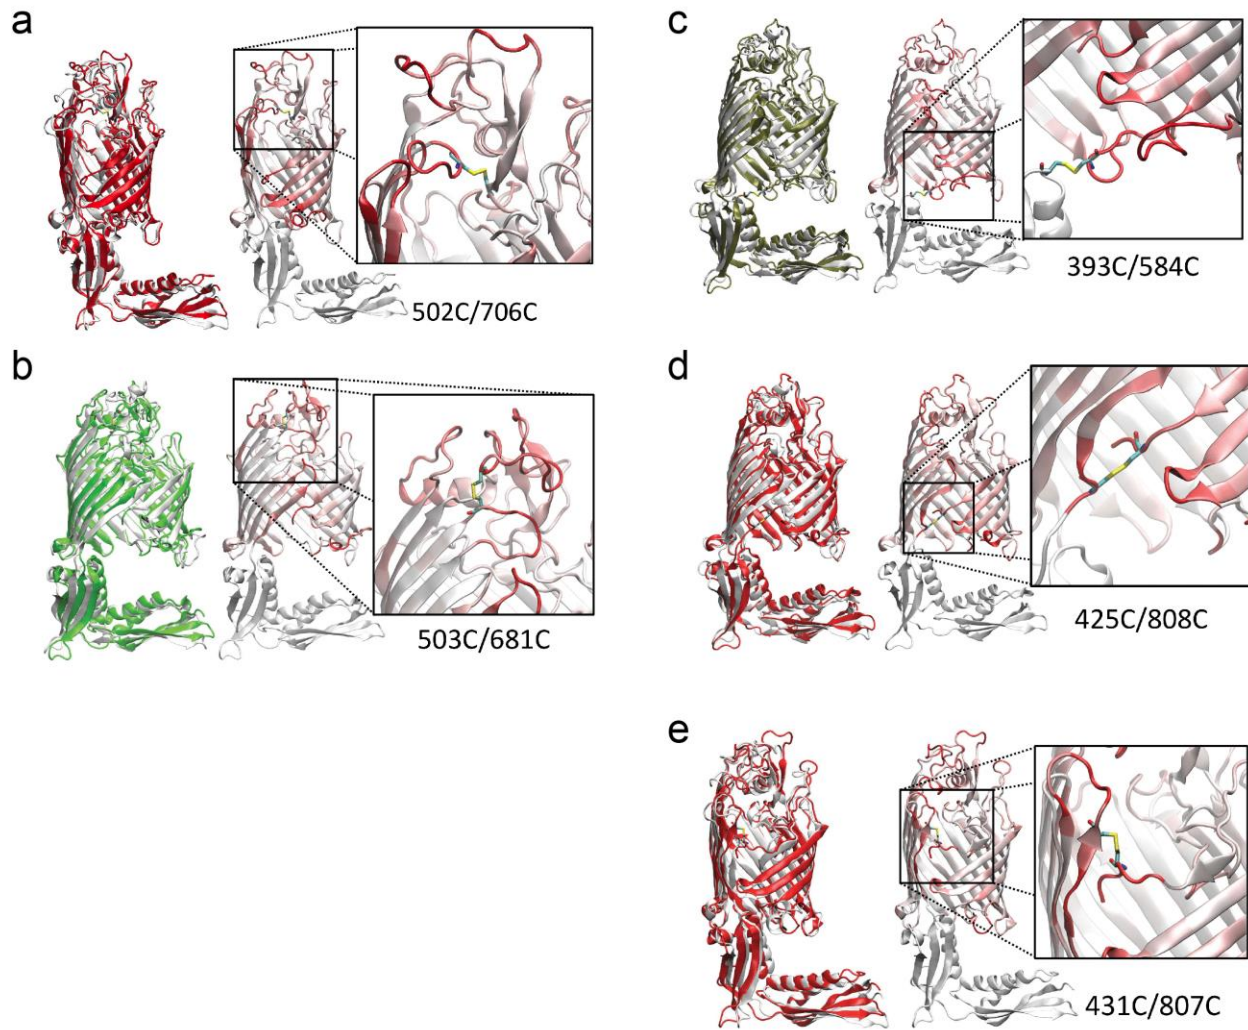

12  
13  
14  
15  
16  
17  
18  
19  
20  
21

1 **Supplementary Figure 13. EM analysis of the BAM/MBP-EspP complex in E3 nanodiscs.** **a.**  
 2 A representative motion corrected micrograph. The scale bar represents 100 nm. **b.** Selected 2D  
 3 classes from 2D classification. **c.** Eight 3D classes from 3D classification. **d.** Refined 3D electron  
 4 density map to 7.0 Å resolution. Plots for FSC resolution estimation (**e**), angular distribution for  
 5 all particles (**f**), and local resolution (**g**) are shown for the final reconstruction.

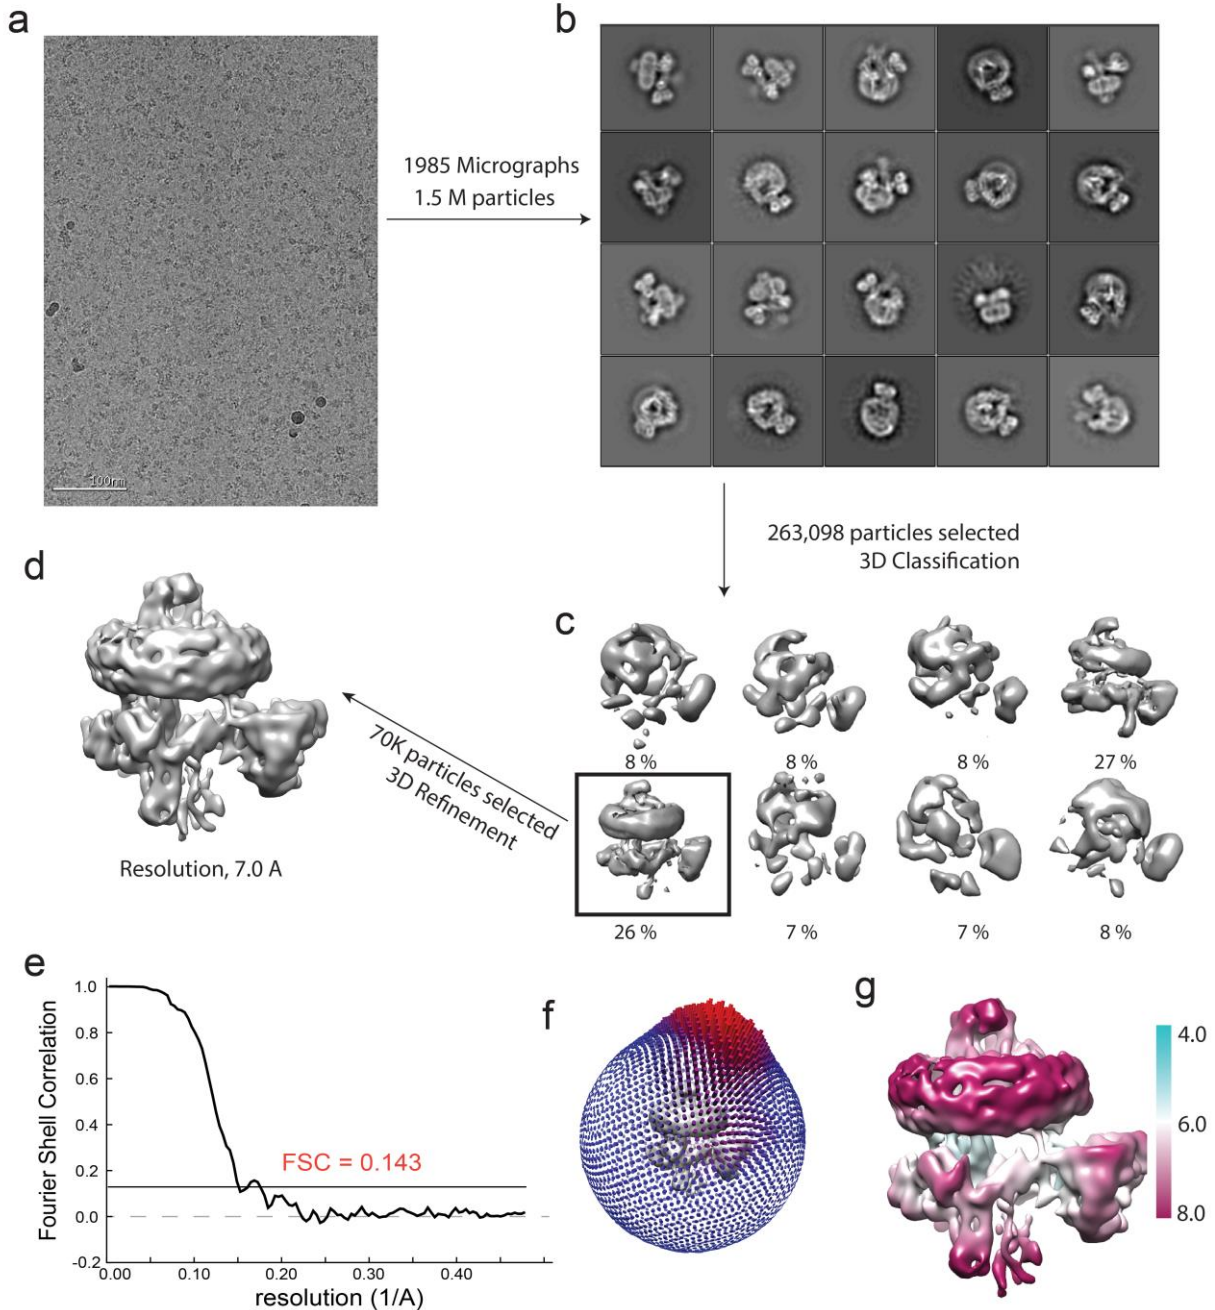

6  
7  
8  
9  
10

1 **Supplementary Figure 14. CryoEM reconstruction of the BAM/EspP<sup>β9-12</sup> complex in**  
 2 **detergent. a.** A representative motion corrected micrograph. The scale bar represents 200 nm. **b.**  
 3 Selected 2D classes from 2D classification. **c.** Six 3D classes from 3D classification. **d.** Refined  
 4 3D electron density map to 3.4 Å resolution. **e.** Plot for FSC resolution estimation for the final  
 5 3D reconstruction.

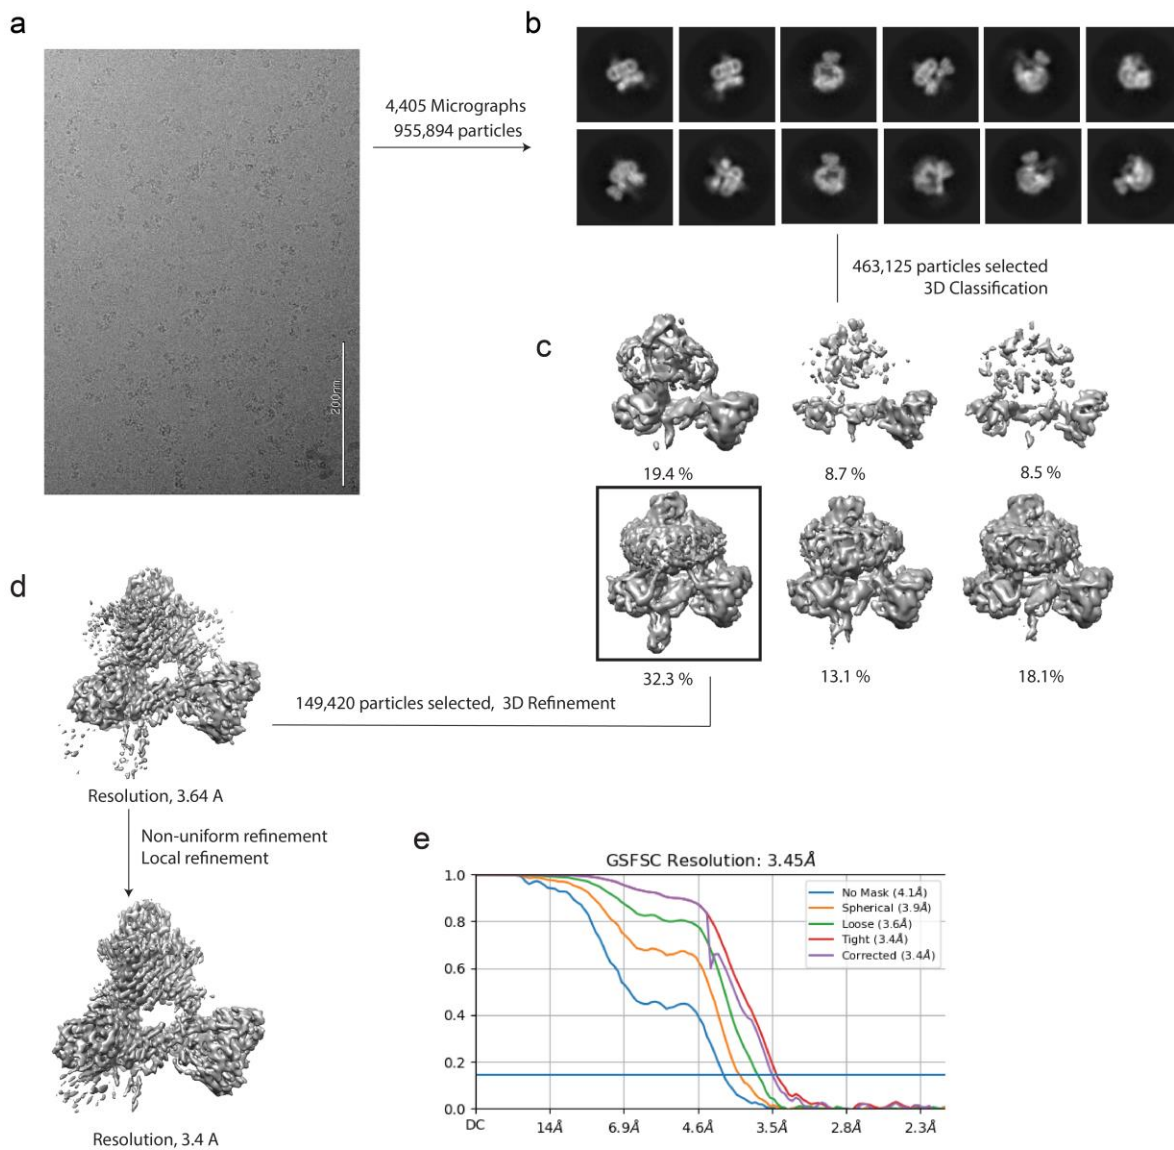

6  
7  
8  
9  
10



**Supplementary Figure 15. Comparison of the BAM cryoEM structures in saposin and**

**MSP1E3D1 nanodiscs.** **a.** Structural alignment of the BAM-saposin structure (4.2 Å) with the inward-open structure (gray) (PDB ID 5D00; RMSD 5.4 Å). **b.** Structural alignment of the BAM-saposin structure with our BAM-MSP1E3D1 structure (4.1 Å) (gray) (RMSD 1.6 Å). **c.** Structural alignment of BamA barrel and POTRA5 only from the BAM-saposin structure with that of the inward-open structure (gray). **d.** Structural alignment of BamA barrel and POTRA5 only from the BAM-saposin structure with our BAM-MSP1E3D1 structure (gray). The only significant change is along  $\beta 1$ -4 which is apparently pushed inward to close the top of the barrel. **e.** An alignment of the cryoEM maps along the nanodisc regions from the BAM-saposin structure (magenta) and from our BAM-MSP1E3D1 structure (green). For reference, the location of BAM is indicated in gray cartoon; portions of the periplasmic domains have been removed. This image demonstrates that the density from the nanodisc appears thicker when using saposin compared to MSP1E3D1. Whether this observation can be attributed to the nanodisc proteins themselves, the difference in lipids used (total lipids vs polar lipids), or from the masking procedures used for the saposin reconstruction is unknown. **f.** Saposin reconstruction contoured at Level 0.012 vs the MSP1E3D1 reconstruction contoured at Level 0.02; and both contoured at Level 0.016 (**g**).

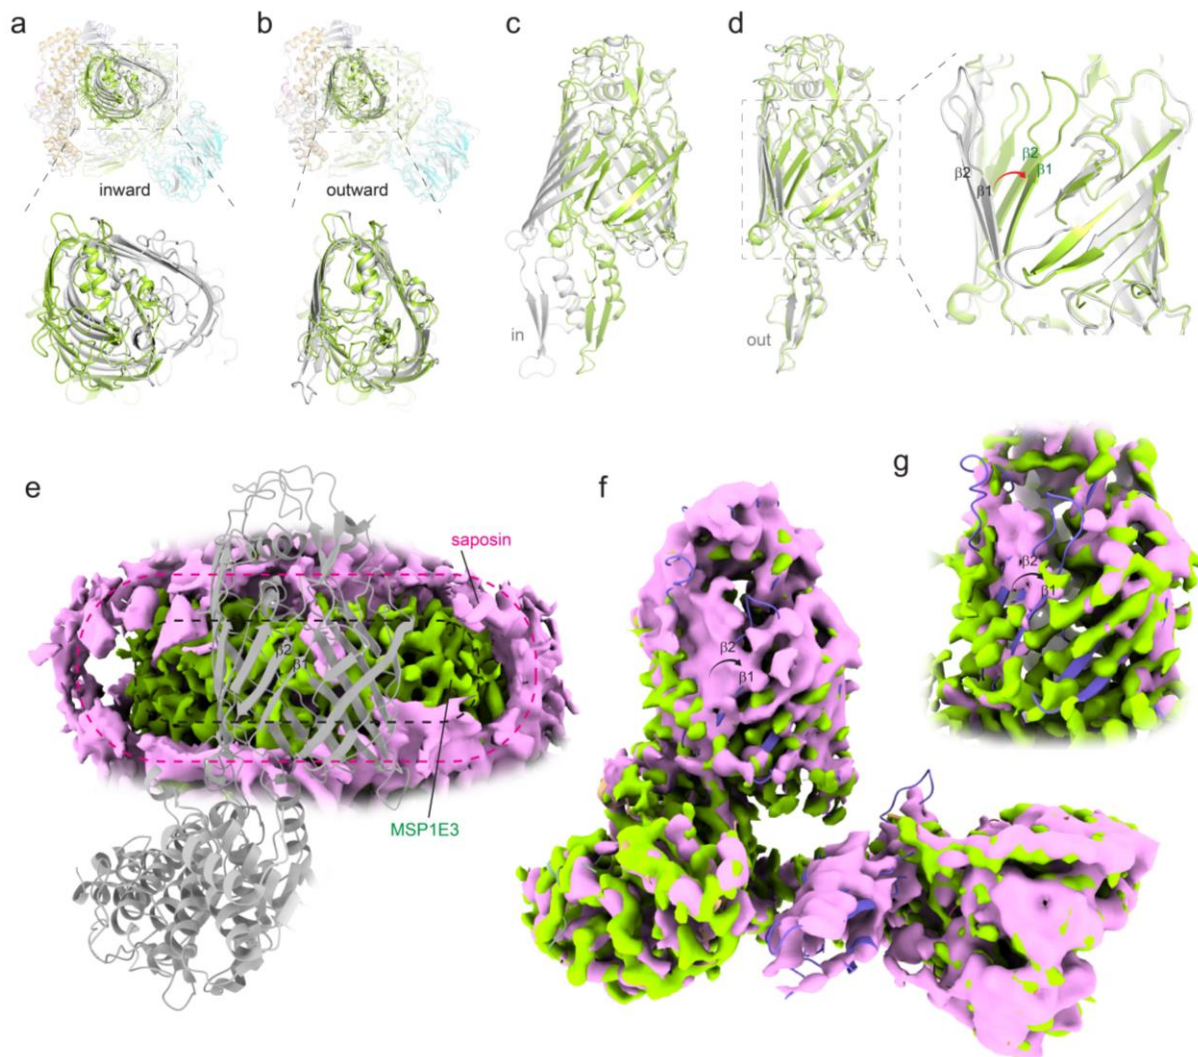



1 **Supplementary Figure 16. Crystal contacts stabilize structures of the BAM $\Delta$ B complex in**  
2 **the outward-open state. (left)** For 5EKQ, the unit cell is shown, while for 5D0Q, two  
3 asymmetric copies in the unit cell are shown. **(right)** For each structure, a close-up of the  
4 POTRA domains, colored (1) grey, (2) cyan, (3) light blue, (4) dark blue, and (5) violet, is  
5 shown. The rest of BamA and BamC-E in that copy are colored purple. A neighboring BamA is  
6 shown in red (5EKQ) or green (5D0Q).

7

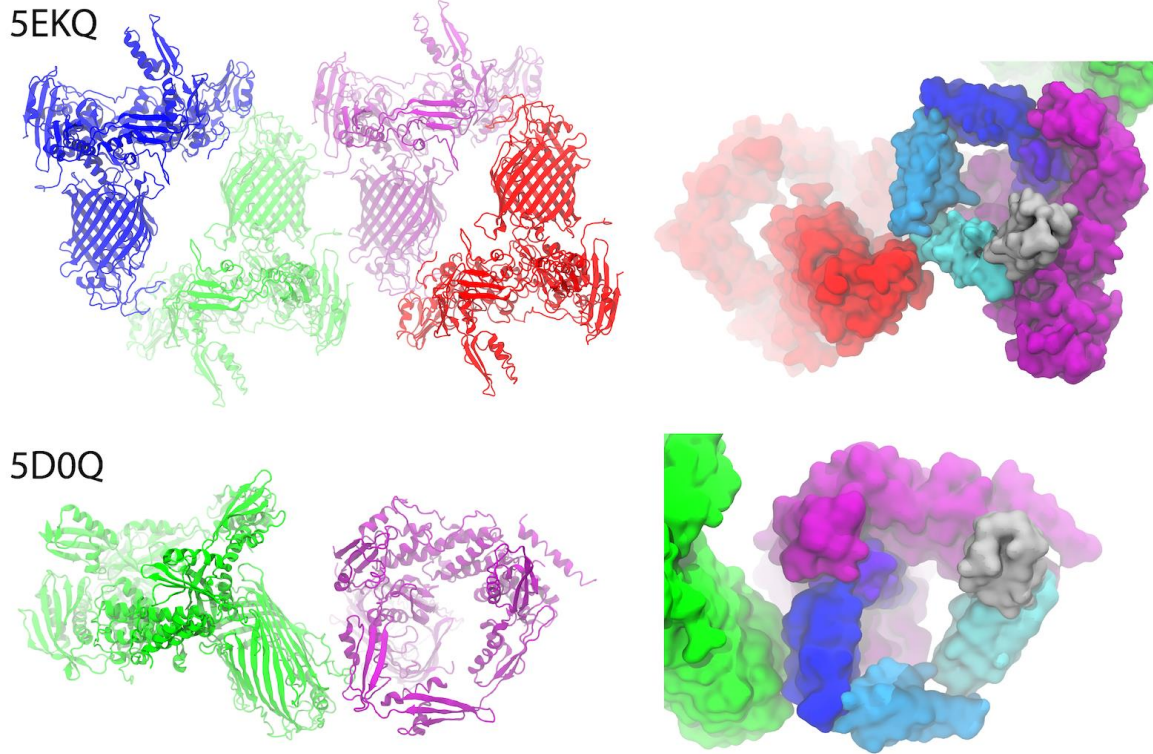

8

9

10

11

12

13

14

15

16

17

1  
2  
3  
4  
5  
6  
7

### Supplementary Figure 17. Hybrid-barrel mechanism for OMP biogenesis by BAM.

Looking down the top of barrel of BamA and the hybrid-barrel intermediate, an updated model for how BAM functions in OMP biogenesis is shown, considering our BAM/MBP-EspP structure (early intermediate) and the recently reported BAM/BamA<sub>sub</sub> structure (late intermediate; PDB ID 6V05). The top row is based on direct structural evidence, while the bottom row is based on hypothesis. The orange arrows indicate conformational switches within the barrel domain of BamA.

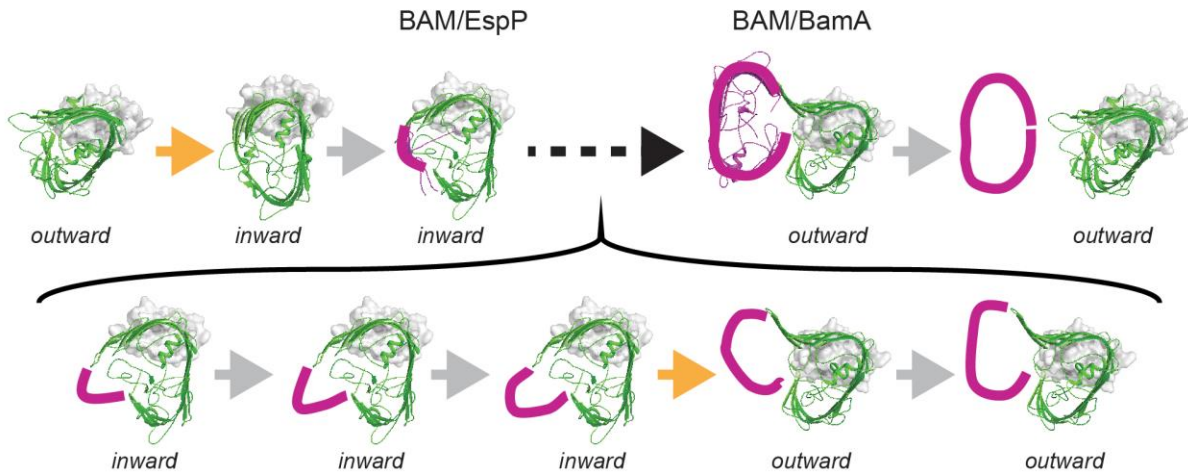

8  
9  
10  
11  
12  
13  
14  
15  
16  
17  
18  
19  
20

1  
2  
3

**Supplementary Table 1. CryoEM data collection and model statistics.** Summary of the data collection and refinement statistics for all cryoEM structures reported in this study.

|                                     | BAM_D1       | BAM_E3       | BAM_N2       | BAM/EspP     | BAM_Native   | BAM_E3HR     | BAM/EspP <sup>B9-12</sup> |
|-------------------------------------|--------------|--------------|--------------|--------------|--------------|--------------|---------------------------|
| <b>Data Collection</b>              |              |              |              |              |              |              |                           |
| Microscope                          | Titan Krios  | Titan Krios  | Titan Krios  | Titan Krios  | Titan Krios  | Titan Krios  | Titan Krios               |
| Magnification                       | 81,000       | 81,000       | 81,000       | 81,000       | 81,000       | 81,000       | ×81,000                   |
| Voltage (kV)                        | 300          | 300          | 300          | 300          | 300          | 300          | 300                       |
| Detector                            | K2           | K2           | K2           | K3           | K3           | K3           | K3                        |
| Software                            | Leginon      | Leginon      | Leginon      | Leginon      | Leginon      | Leginon      | Leginon                   |
| Exposure (s/fr)                     | 0.2          | 0.2          | 0.2          | 0.078        | 0.065        | 0.065        | 0.065                     |
| # of frames/mic                     | 60           | 60           | 60           | 40           | 40           | 40           | 40                        |
| Total dose (e-/Å <sup>2</sup> )     | 43.85        | 43.85        | 43.85        | 51.14        | 44.9         | 44.9         | 44.77                     |
| Defocus (µm)                        | -1.5 to -2.5 | -1.5 to -2.5 | -1.5 to -2.5 | -1.5 to -2.5 | -1.5 to -2.5 | -1.5 to -2.5 | -1.0 to -2.0              |
| Pixel size (Å)                      | 0.69         | 0.69         | 0.69         | 0.525        | 0.525        | 0.525        | 0.54                      |
| <b>Image processing</b>             |              |              |              |              |              |              |                           |
| Micrographs                         | 961          | 1115         | 1111         | 1985         | 2247         | 5217         | 4,405                     |
| # Initial particles                 | 783,635      | 813,270      | 1,196,641    | 1,529,450    | 256,440      | 8,053,211    | 955,894                   |
| # Final particles                   | 39,504       | 73,038       | 72,244       | 70,031       | 54,989       | 1,121,059    | 149,420                   |
| Symmetry                            | C1           | C1           | C1           | C1           | C1           | C1           | C1                        |
| FSC threshold                       | 0.143        | 0.143        | 0.143        | 0.143        | 0.143        | 0.143        | 0.143                     |
| Final resol. (Å)                    | 8.0          | 6.9          | 7.5          | 7.0          | 5.9          | 4.0          | 3.4                       |
| <b>Model composition</b>            |              |              |              |              |              |              |                           |
| # Residues                          | 1,510        | 1,510        | 1,510        | 1614         | 1,510        | 1,510        | 1,578                     |
| <b>Model Refinement</b>             |              |              |              |              |              |              |                           |
| Refinement                          | Phenix       | Phenix       | Phenix       | Phenix       | Phenix       | Phenix       | Phenix                    |
| R.m.s. deviations from ideal values |              |              |              |              |              |              |                           |
| Bond lengths (Å)                    | 0.007        | 0.005        | 0.007        | 0.008        | 0.009        | 0.007        | 0.003                     |
| Bond angles (°)                     | 0.988        | 0.875        | 1.039        | 1.262        | 1.438        | 1.038        | 0.674                     |
| <b>Validation</b>                   |              |              |              |              |              |              |                           |
| Ramachandran (%)                    |              |              |              |              |              |              |                           |
| Favored (%)                         | 81.92        | 83.25        | 80.13        | 79.06        | 79.34        | 86.75        | 89.64                     |
| Allowed (%)                         | 17.75        | 16.56        | 19.47        | 20.82        | 20.33        | 13.05        | 10.29                     |
| Disallowed (%)                      | 0.33         | 0.2          | 0.4          | 0.12         | 0.33         | 0.20         | 0.07                      |
| Rotamer outliers (%)                | 1.32         | 0.82         | 1.32         | 0.23         | 0.0          | 0.08         | 10.0                      |
| Clashscore                          | 64.43        | 50.14        | 66.48        | 59.09        | 75.43        | 21.42        | 10.74                     |
| Map CC (main)                       | 0.86         | 0.80         | 0.78         | 0.84         | 0.77         | 0.74         | 0.83                      |
| Map CC (side)                       | 0.84         | 0.78         | 0.77         | 0.83         | 0.75         | 0.73         | 0.82                      |
| <b>EMDB ID</b>                      | 24476        | 24478        | 24477        | 24481        | 24475        | 24474        | 24473                     |
| <b>PDB ID</b>                       | 7RI7         | 7RI9         | 7RI8         | 7RJ5         | 7RI6         | 7RI5         | 7RI4                      |

4  
5  
6

1 **Supplementary Table 2. Summary of primers and plasmids.**

| <b>Primer Name</b>        | <b>Sequence</b>                                                |
|---------------------------|----------------------------------------------------------------|
| Mal_F                     | TTTTCCATGGGGGCCAAAATCGAAGAAGG                                  |
| Mal_R                     | AAAAGGATCCAGTCTGCGCGTCTTTCAGGGC                                |
| EspP(948-1300)_F          | TTTTGGATCCATTGAACTGGTAAGCGCGCC                                 |
| EspP(948-1300)_R          | AAAACCTCGAGTCAGAACGAGTAACGG                                    |
| C690S/C700S_F             | GATTACGAATCTGCGACTCAGGACGGCGCGAAAGACCTGTCT                     |
| C690S/C700S_R             | CGATTTAGACAGGTCTTTCGCGCCGTCTGAGTCGCAGATTC                      |
| N805C_F                   | GTTCCAGTTTTGCATCGGTA AAAACC                                    |
| N805C_R                   | GGTTTTACCGATGCAAAACTGGAAC                                      |
| I806C_F                   | CAGTTTAACTGCGGTA AAAACC                                        |
| I806C_R                   | GGTTTTACCGCAGTTAAACTG                                          |
| G807C_F                   | GTTTAAACATCTGTAAAACCTGG                                        |
| G807C_R                   | CCAGGTTTTACAGATGTTAAAC                                         |
| G1226C_F                  | GCCCGTGCCTGTCTGGGCTAC                                          |
| G1226C_R                  | GTAGCCAGACAGGCACGGGC                                           |
| G1228C_F                  | GCCGGTCTGTGCTACCAGTTC                                          |
| G1228C_R                  | GAACGGTAGCACAGACCGGC                                           |
| Q1230C_F                  | CTGGGCTACTGTTTCGACCTG                                          |
| Q1230C_R                  | CAGGTCGAAACAGTAGCCCAG                                          |
| D1232C_F                  | GGCTACCAGTTCTGCCTGCTGGC                                        |
| D1232C_R                  | GCCAGCAGGCAGAACTGGTAGCC                                        |
| L1234C_F                  | GTTTCGACCTGTGTGCTAACGGC                                        |
| L1234C_R                  | GCCGTTAGCACACAGGTCGAAC                                         |
| EspP_β9-12_F              | TTTGGTCTCGAGGTCAAAGTGACAGCCCGTGC                               |
| EspP_β9-12_R              | AAAGGTCTCGACCTCGTTCAGAAACGCTTTATAG                             |
|                           |                                                                |
| <b>Plasmids</b>           | <b>Description/References</b>                                  |
| pJH114xB                  | pJH114 <sup>1</sup> with an extra copy of BamB added           |
| pMSP1D1                   | Addgene; Gift from Stephen Sligar                              |
| pMSP1E3D1                 | Addgene; Gift from Stephen Sligar                              |
| pMSP2N2                   | Kindly provided by J. Psonis                                   |
| pHis2/MBP-EspP            | pHIS-Parallel2 vector; expression of MBP-EspP inclusion bodies |
| pCDF-1b                   | Novagen plasmid                                                |
| pBAD/HisA                 | ThermoFisher plasmid                                           |
| pRW1                      | pCDF-1b with promoter changed to araBAD                        |
| pRW1/MBP-EspP             | pRW1 expressing MBP-EspP                                       |
| pRW1/MBP-EspPβ9-12        | pRW1 expressing MBP-EspPβ9-12                                  |
| pRW1/MBP-EspPG1226C_β9-12 | pRW1 expressing MBP-EspPG1226C_β9-12                           |
| pRW1/MBP-EspPG1228C_β9-12 | pRW1 expressing MBP-EspPG1228C_β9-12                           |
| pRW1/MBP-EspPQ1230C_β9-12 | pRW1 expressing MBP-EspPQ1230C_β9-12                           |
| pRW1/MBP-EspPD1232C_β9-12 | pRW1 expressing MBP-EspPD1232C_β9-12                           |
| pRW1/MBP-EspPL1232C_β9-12 | pRW1 expressing MBP-EspPL1232C_β9-12                           |
| pJH114C690S/C700S         | pJH114 producing cysteine-less BamA                            |
| pJH114C690S/C700S/G807C   | pJH114 producing cysteine-less BamA and G807C mutation         |
| pJH114C690S/C700S/I806C   | pJH114 producing cysteine-less BamA and I806C mutation         |

2

3



1

2

## Supplementary References

3

4

- 1 Roman-Hernandez, G., Peterson, J. H. & Bernstein, H. D. Reconstitution of bacterial autotransporter assembly using purified components. *Elife* **3**, e04234, doi:10.7554/eLife.04234 (2014).

5

6

7
